# Supplementary material for: Genome-Wide Nucleosome Positioning Is Orchestrated by Genomic Regions Associated with DNase I Hypersensitivity in Rice
Source: PubMed Central journal article supplement (PMC4031139; doi:10.1371/journal.pgen.1004378), 2014-05-22
Supplement: pgen.1004378.s001.pdf [file pgen.1004378.s001.pdf]

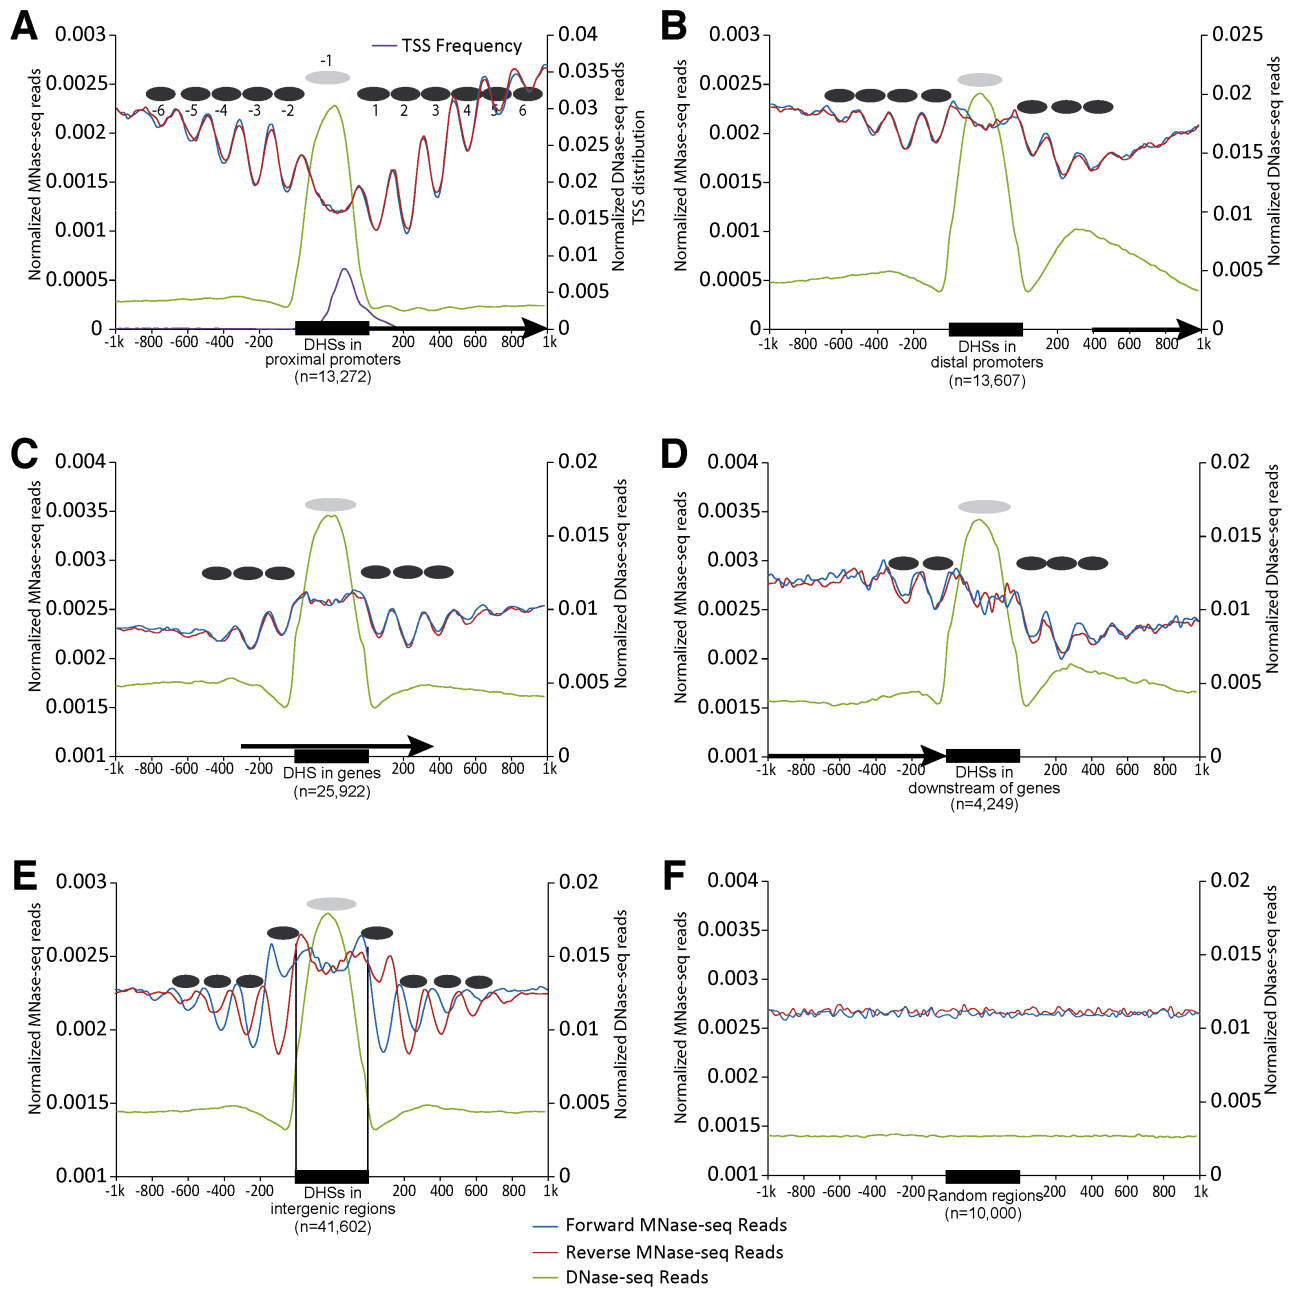

**Figure S1**
